# Supplementary material
Source: publisher figshare collection journal article supplement (https://springernature.figshare.com/ndownloader/files/20133230)
Supplement: Supplementary file [file 20133230]

*Additional file 1: Characteristics of the evaluated intervention*

| ID               | Title                                                                                                                                               | Place of study (Country ) | Description of the drug access mechanism before the intervention                                                                                                          | Intervention (description)                                                                                                                                                                  | Year of the intervention implementation (4 digits) | Study design |
|------------------|-----------------------------------------------------------------------------------------------------------------------------------------------------|---------------------------|---------------------------------------------------------------------------------------------------------------------------------------------------------------------------|---------------------------------------------------------------------------------------------------------------------------------------------------------------------------------------------|----------------------------------------------------|--------------|
| Balkrishna n2001 | Effect of prescription benefit changes on medical care utilization in a Medicare HMO population                                                     | USA                       | 1) \$500 annual limit, \$6 co-payment for generics and \$12 for reference medicines;<br>2) \$200 quarterly limit, \$7 for generics and \$15 for reference medicines.      | 1) \$200 quarterly limit, \$7 for generics and \$15 for reference medicines;<br>2) \$25 monthly limit for reference medicines, \$5 co-payment for generics and \$15 for reference medicines | 1. 1998;<br>2. 1999                                | RMS          |
| Burton2008       | The association between a tiered pharmacy benefit plan and medication usage, health status, and disability absence days - One employer's experience | USA                       | Tier co-payment in two levels:<br>1) Between US\$ 8 for 30 days filling or US\$ 15 for 90 days filling;<br>2) US\$ 10 for 30 days filling and US\$ 40 or 90 days filling. | Tier co-payment in three levels:<br>1) US\$ 10;<br>2) US\$ 20-25;<br>3) US\$ 35-40.                                                                                                         | 2003                                               | CRM          |
| Chandra2007      | Patient Cost-Sharing, Hospitalization Offsets, and the Design of Optimal Health Insurance for the Elderly                                           | USA                       | \$5 for generics;<br>\$10 for reference medicines.                                                                                                                        | \$5 for generics;<br>\$15 for reference medicines in the formulary;<br>\$30 for reference medicines not in the formulary<br>\$1000 deductible in 2001                                       | 2001/2001                                          | CBA          |

*Additional file 1: Characteristics of the evaluated intervention*

| ID           | Title                                                                                                                          | Place of study (Country) | Description of the drug access mechanism before the intervention | Intervention (description)                                                                                                                                                                                                                                                                                                                                                                                                                                                                                                      | Year of the intervention implementation (4 digits) | Study design |
|--------------|--------------------------------------------------------------------------------------------------------------------------------|--------------------------|------------------------------------------------------------------|---------------------------------------------------------------------------------------------------------------------------------------------------------------------------------------------------------------------------------------------------------------------------------------------------------------------------------------------------------------------------------------------------------------------------------------------------------------------------------------------------------------------------------|----------------------------------------------------|--------------|
| Dormuth2008  | Emergency hospital admissions after income-based deductibles and prescription copayments in older users of inhaled medications | Canada                   | Elderly ( $\geq 65$ years) had full coverage for medicines       | <b>Copay:</b> Low-income seniors pay \$10/prescription (in the first 20 of the year) while the other seniors pay \$25/prescription for the first 11 prescriptions of the year. After these limits, the prescriptions become exempt of co-payment.<br><b>IBD:</b> Based on family income implemented with 3 components: 1) Family deductible of 0 to 2% depending on the family income; 2) 25% payment of the prescription cost after passing the amount of the deductible and; 3) Ceiling equal to 1.25, 2 or 3% of the income. | 2002(Copay)<br>2003 (IBD)                          | CRMS         |
| Elhayany2011 | Addressing healthcare inequities in Israel by eliminating prescription drug copayments                                         | Israel                   | Medicines co-payment                                             | 100% co-payment subsidy of for low-income patients with hypertension, diabetes and/or dyslipidemia.                                                                                                                                                                                                                                                                                                                                                                                                                             | 2006                                               | RMS          |
| Farley2010b  | Medicaid prescription cost containment and schizophrenia: A retrospective examination                                          | USA                      | US\$1,00 Reference medicines co-payment                          | a) Cap of 7 prescriptions/member/month;<br>b) Mandatory pre-authorization for monthly dispensations above 5 prescriptions;<br>c) Increase from \$1 to \$3 for reference medicine/dispensation;<br>d) Compulsory dispensing of generics;<br>e) 34 days restriction per dispensation;<br>f) Reduction in the pharmacies dispensing rate and physician reimbursement.                                                                                                                                                              | 2002                                               | CRM          |

*Additional file 1: Characteristics of the evaluated intervention*

| ID               | Title                                                                                                                                              | Place of study (Country) | Description of the drug access mechanism before the intervention                                                                                                              | Intervention (description)                                                                                                      | Year of the intervention implementation (4 digits) | Study design |
|------------------|----------------------------------------------------------------------------------------------------------------------------------------------------|--------------------------|-------------------------------------------------------------------------------------------------------------------------------------------------------------------------------|---------------------------------------------------------------------------------------------------------------------------------|----------------------------------------------------|--------------|
| Hartung2008      | Impact of a Medicaid copayment policy on prescription drug and health services utilization in a fee-for-service Medicaid population                | USA                      | NI                                                                                                                                                                            | Co-payment: \$2 for generics; \$3 for reference medicines.                                                                      | 2003                                               | ITS          |
| Johnson1997      | The Effect of Increased Prescription Drug Cost-Sharing on Medical Care Utilization and Expenses of Elderly Health Maintenance Organization Members | USA                      | A) \$1/prescription (1987), \$3/ prescription (1988);<br>B) 50%/ dispensing with cap of \$25/dispensing                                                                       | A) \$5/prescription;<br>B) 70%/ dispensing with cap of \$30/dispensing                                                          | A)1988<br>B) 1990                                  | CBA          |
| Li2007           | The impact of cost sharing of prescription drug expenditures on health care utilization by the elderly: Own- and cross-price elasticities          | Canada                   | Dispensing rate until annual maximum of CAN\$200                                                                                                                              | A) Maximum of CAN\$ 25/dispensing and annual cap of CAN\$275;<br>B) Maximum of CAN\$ 10/ dispensing and annual cap of CAN\$200; | 2002                                               | BA           |
| Livingstone 2004 | An investigation of the impact of supplementary health benefits for low-income families in Saskatchewan                                            | Canada                   | Ceiling of \$850/semester. Above that, the family pay 35% of the medicines' cost.                                                                                             | Familiar ceiling of \$100/semester. Above that, the family pay 35% of the medicines' cost.                                      | 1998                                               | BA           |
| Nair2009b        | Prescription copay reduction program for diabetic employees: Impact on medication compliance and healthcare costs and utilization                  | USA                      | a) Annual deductible of \$100/individual or \$300/family.<br>b) Co-payment: \$10 for generics; \$20 for selected reference medicines; \$30 for the other reference medicines. | All medicines and supplies needed to control diabetes at the lowest level of co-payment, \$10 at pharmacies.                    | 2005                                               | BA           |

*Additional file 1: Characteristics of the evaluated intervention*

| ID              | Title                                                                                                                                                       | Place of study (Country) | Description of the drug access mechanism before the intervention                                                                  | Intervention (description)                                                                                                                                                                                                                          | Year of the intervention implementation (4 digits) | Study design |
|-----------------|-------------------------------------------------------------------------------------------------------------------------------------------------------------|--------------------------|-----------------------------------------------------------------------------------------------------------------------------------|-----------------------------------------------------------------------------------------------------------------------------------------------------------------------------------------------------------------------------------------------------|----------------------------------------------------|--------------|
| Pilote2002      | The effects of cost-sharing on essential drug prescriptions, utilization of medical care and outcomes after acute myocardial infarction in elderly patients | Canada                   | Co-pay for seniors \$ 2/prescription up to \$100 maximum per year. Low-income seniors and pensioners were exempt from co-payment. | A) Payment of 25% of the amount of the prescription with a ceiling of \$200, \$500 or \$750, depending on the income. Quarterly co-payment and deductible;<br>B) Annual deductible: \$0-350 depending on income. Monthly co-payment and deductible. | A)1996<br><br>B) 1997                              | BA           |
| Subramanian2011 | Impact of medicaid copayments on patients with cancer: Lessons for medicaid expansion under health reform                                                   | USA                      | A) Co-payment of \$ 0.50 for medicines;<br>B) No co-payment for health services.                                                  | A) \$ 0.75 for selected generics and reference medicines;<br>B) \$ 3.00 for unselected references;<br>C) Introduction of various co-payments (\$ 12.50- \$ 2.00) for use of health services.                                                        | 2002/2003                                          | CBA          |
| Wang2010b       | Impact of drug cost sharing on service use and adverse clinical outcomes in elderly receiving antidepressants                                               | Canada                   | Full cover. \$7 payment as dispensing fee.                                                                                        | A) Co-pay of CAN\$25 or CAN\$10 for seniors and low-income population;<br><br>B) Deductible based on income. Once reached, 25% payment of the total cost. When the ceiling is reached, the insured has full coverage.                               | A) 2002<br><br>B) 2003                             | ITS          |
| Li2013          | Medicare part D is associated with reducing the financial burden of health care services in medicare beneficiaries with diagnosed diabetes                  | USA                      | NI                                                                                                                                | Medicare Part D (not described)                                                                                                                                                                                                                     | 2006                                               | ITS/<br>RMS  |
| Kircher2014     | Impact of Medicare Part D on out-of-pocket drug costs and medical use for patients with cancer.                                                             | USA                      | NI                                                                                                                                | Medicare Part D (not described)                                                                                                                                                                                                                     | 2006                                               | CBA/<br>BA   |

*Additional file 1: Characteristics of the evaluated intervention*

| ID              | Title                                                                                                                                                        | Place of study (Country ) | Description of the drug access mechanism before the intervention                                                                                                                                                                                       | Intervention (description)                                                                                                                                                                                  | Year of the intervention implementation (4 digits) | Study design |
|-----------------|--------------------------------------------------------------------------------------------------------------------------------------------------------------|---------------------------|--------------------------------------------------------------------------------------------------------------------------------------------------------------------------------------------------------------------------------------------------------|-------------------------------------------------------------------------------------------------------------------------------------------------------------------------------------------------------------|----------------------------------------------------|--------------|
| Maciejewski2014 | Value-based insurance design program in north Carolina increased medication adherence but was not cost neutral.                                              | USA                       | Generics with some copay and branded name medicines in tier 3                                                                                                                                                                                          | Generics with no copayment and branded name medicines passed to tier 2 (cheaper) for medicines to treat hypertension, hyperlipidemia, diabetes, and congestive heart failure                                | 2008                                               | CBA/BA       |
| Park2015        | Health Costs and Outcomes Associated with Medicare Part D Prescription Drug Cost-Sharing in Beneficiaries on Dialysis.                                       | USA                       | NI                                                                                                                                                                                                                                                     | Medicare Part-D. In 2007, the gap interval was defined as out-of-pocket spending on medicines between \$799 and \$3,850,6 where beneficiaries were responsible for all of their drug costs during this gap. | 2007                                               | CBA/BA       |
| Comaru2016      | Free asthma medications reduces hospital admissions in Brazil (Free asthma drugs reduces hospitalizations in Brazil).                                        | Brazil                    | Free of charge at public institutions, costsharing for some medicines at private pharmacies (90% subsidized) or out-of-pocket                                                                                                                          | Free of charge at private pharmacies for asthma medicines                                                                                                                                                   | 2011                                               | CBA/BA       |
| Fukushima 2016  | Patient cost sharing and medical expenditures for the Elderly                                                                                                | Japan                     | 30% coinsurance                                                                                                                                                                                                                                        | 10% coinsurance after turning 70 years old                                                                                                                                                                  | NI                                                 | ITS/RMS      |
| Puig-Junoy2016  | Free medicines thanks to retirement: Impact of coinsurance exemption on pharmaceutical expenditures and hospitalization offsets in a national health service | Spain                     | 40% coinsurance rate for outpatient prescription medicines; 10% to AIDS patients and to medicines mainly prescribed for chronic diseases, with a price cap of €2.64 per prescription; medicines to hospitalized patients were provided free of charge. | After retirement: No copayment (including dependants)                                                                                                                                                       | NI                                                 | CBA/BA       |

*Additional file 1: Characteristics of the evaluated intervention*

| ID          | Title                                                                                                            | Place of study (Country) | Description of the drug access mechanism before the intervention                                                                                                                                                                                                                                                                                                                                    | Intervention (description)                                                                                                                                                                                                                                                                  | Year of the intervention implementation (4 digits) | Study design |
|-------------|------------------------------------------------------------------------------------------------------------------|--------------------------|-----------------------------------------------------------------------------------------------------------------------------------------------------------------------------------------------------------------------------------------------------------------------------------------------------------------------------------------------------------------------------------------------------|---------------------------------------------------------------------------------------------------------------------------------------------------------------------------------------------------------------------------------------------------------------------------------------------|----------------------------------------------------|--------------|
| Huh2017     | Did Medicare Part D reduce mortality?                                                                            | USA                      | Prescription Drug Discount Card: discounted prices for medicines (12–21% for brand name drugs, and 45–75% for generic drugs). Possibility of charging up to \$30 for annual enrollment.                                                                                                                                                                                                             | Medicare Part D (standard benefit): monthly premium of \$32.20, a \$250 deductible, and a coinsurance rate that begins at 25%, rises to 100% after an initial benefit limit (the “donut hole”), and then falls to 5% once the beneficiary has incurred \$3600 in out-of-pocket expenditures | 2006                                               | ITS/RMS      |
| Kostova2017 | Chronic Health Outcomes and Prescription Drug Copayments in Medicaid.                                            | USA                      | No copayment                                                                                                                                                                                                                                                                                                                                                                                        | Copayment introduction                                                                                                                                                                                                                                                                      | 2003 and 2010                                      | CBA/BA       |
| Pak2017     | The impact of Medicare Part D on cognitive functioning at older ages                                             | USA                      | NI                                                                                                                                                                                                                                                                                                                                                                                                  | Medicare Part D (not described).                                                                                                                                                                                                                                                            | 2006                                               | ITS/RMS      |
| Park2017    | The effect of Medicare Part D on prescription drug spending and health care use: 6 Years of follow-up, 2007-2012 | USA                      | NI                                                                                                                                                                                                                                                                                                                                                                                                  | Medicare Part D (not described)                                                                                                                                                                                                                                                             | 2006                                               | CBA/BA       |
| Elliott2013 | Patient-centered outcomes of a value-based insurance design program for patients with diabetes                   | USA                      | 30-day prescription: \$10 for generic medicines, \$25 for preferred brand medicines, and \$50 for nonformulary brand medicines.<br>90-day prescription: \$25 for generic medicines, \$63 for preferred brand medicines, and \$125 for nonformulary brand medicines.<br>Supplies, including syringes and glucose monitoring supplies, were covered without co-payment to an annual maximum of \$7500 | Co-payments for all hypoglycemic medications and supplies were eliminated                                                                                                                                                                                                                   | 2009-2010                                          | CBA/BA       |

*Additional file 1: Characteristics of the evaluated intervention*

| ID         | Title                                                                                                                                                                               | Place of study (Country) | Description of the drug access mechanism before the intervention                                                                                                                                                            | Intervention (description)                                                                                                        | Year of the intervention implementation (4 digits) | Study design |
|------------|-------------------------------------------------------------------------------------------------------------------------------------------------------------------------------------|--------------------------|-----------------------------------------------------------------------------------------------------------------------------------------------------------------------------------------------------------------------------|-----------------------------------------------------------------------------------------------------------------------------------|----------------------------------------------------|--------------|
| Hanlon2013 | Racial differences in antilipemic use and lipid control in high-risk older adults: Post-Medicare Part D                                                                             | USA                      | Lower coverage of medicines insurance, possibly most of the population previous to the intervention bought their medicines out-of-pocket. However, it could had different kinds of coverage previously to the intervention. | Medicare Part D (not described): assumption of better coverage for medicines and, therefore, facilitated and better access.       | 2006                                               | CBA/BA       |
| Nelson2014 | The effect of Medicare Part D on health care utilization for non-elderly Medicare recipients with disabilities                                                                      | USA                      | NI                                                                                                                                                                                                                          | Medicare Part D (not described): assumption of better coverage for medicines and, therefore, facilitated and better access to it. | 2006                                               | CBA/BA       |
| Ryan2014   | Clinical outcomes and incremental costs from a medication adherence pilot intervention targeting low-income patients with diabetes at risk of cost-related medication nonadherence. | USA                      | Copayments ranged from \$0 to \$167.00 per prescription                                                                                                                                                                     | Exemption from copayment                                                                                                          | 2012-2013                                          | CBA/BA       |
| Lee2017    | The effect of increasing the coinsurance rate on outpatient utilization of healthcare services in South Korea.                                                                      | South Korea              | 30% of coinsurance rate on prescription medicines costs                                                                                                                                                                     | Coinsurance rate of 50% in tertiary hospitals and 40% in general hospitals                                                        | 2011                                               | ITS/RMS      |

Subtitle: USA: United States of America; NI: Not Informed; BA: before and after; ITS: interrupted time series; CBA: controlled before and after; BA: before and after; CRM: controlled repeated measure; RMS: repeated measure study.
